# Supplementary material for: The Biomarkers for Acute Myocardial Infarction and Heart Failure
Source: Hindawi journal article supplement (doi:10.1155/2020/2018035), 2020-01-01
Supplement: f1 [file 2018035.f1.pdf]

Table S1: Summary of clinical trials for cardiac troponin

| First author        | Year | Biomarker (s)      | Study design | Findings                                                                                                                                                                                                                                                                                                                  | Ref. |
|---------------------|------|--------------------|--------------|---------------------------------------------------------------------------------------------------------------------------------------------------------------------------------------------------------------------------------------------------------------------------------------------------------------------------|------|
| Shah AS             | 2015 | hs-cTnI            | prospective  | In 30 days, the NPV of troponin concentration <5 ng / L for MI or cardiogenic death is 99.6%; At 1 year, risk of MI and cardiac death was lower in patients with cTn<5 ng/L than cTn >5 ng/L (0.6% vs 3.3%, p < 0.001)                                                                                                    | 21   |
| Grinstein J         | 2015 | hsTnT              | prospective  | hsTnT ≥14 ng/L carried a 5.2-fold higher risk of CVD or MI; The hsTnT concentration of 14-50 ng / L was more than 3.3-fold higher short-term risk of CVD or recurrent MI compared to patient at <14 ng/L                                                                                                                  | 22   |
| Magnoni M           | 2018 | hsTnT              | prospective  | At 30 and 180 days, patients with hsTnT ≥14 ng/L had a higher rate of CVD or MI (30-day: 5.9% vs 0.8% p = 0.001; 180-day: 11.1% vs 4.7% p = 0.002).                                                                                                                                                                       | 23   |
| Haaf P              | 2014 | hs-cTnT<br>hs-cTnI | prospective  | hs-cTnT predicts mortality more accurately than hs-cTnI assays in patients with suspected AMI. (0.78 vs 0.71); Changes of hs-cTn did not further improve risk stratification beyond initial presentation values                                                                                                           | 27   |
| Boeddinghaus J      | 2017 | hs-cTnT<br>hs-cTnI | prospective  | In patients with mild hs-cTnT/(hs-cTnT:26.2 ng/L-75ng/L; hs-cTnI:14 ng/L-50ng/L), diagnostic accuracy for AMI is 0.51 for hs-cTnI, 0.78 for 1h-hs-cTnI changes                                                                                                                                                            | 28   |
| Pickering JW        | 2016 | hs-cTnT<br>hs-cTnI | prospective  | The ESC-rule-in algorithm has good specificity and can rule-in approximately 60% of AMIs. The sensitivity to rule-out AMI is too low for clinical use                                                                                                                                                                     | 29   |
| Boeddinghaus J      | 2018 | hs-cTnT<br>hs-cTnI | prospective  | Rule-out safety (young 100%, middle 99.3%, old 99.3%) of the ESC hs-cTnT 0/1h-algorithm was very high in all age-strata; Accuracy of rule-in (young 97%, middle 96.1%, old 92.7%) and triage efficacy (young 93%, middle 80%, old 55%) decreased with age                                                                 | 30   |
| Mueller-Hennessen M | 2016 | hs-cTn             | prospective  | Age-specified cut-offs reclassified patients for outcomes of 1-month and 3-month mortality in the ACS cohort (p<0.001) No significant differences in outcomes could be found using gender-specific cut-offs.                                                                                                              | 31   |
| Yang S              | 2016 | hs-cTnT            | prospective  | According to the age and gender tailored cutoff value, the specificity and positive predictive value of AMI diagnosis were increased from 53.9% to 72.2% and 48.6% to 60.8%                                                                                                                                               | 33   |
| Rubini Gimenez M    | 2014 | hs-cTnT/I          | prospective  | Compared with hs-cTnT, early reporters (<3 h) hs-cTnI showed higher diagnostic accuracy (0.92 vs 0.89, P = 0.019), while in late presenters hs-cTnI was superior than hs-cTnT (0.96 vs 0.94, P = 0.007); hs-cTnT had a higher prognostic accuracy for all-cause mortality compared with hs-cTnI. (0.8 vs 0.75, P < 0.001) | 34   |
| Klinkenberg LJ      | 2016 | hs-cTnT/I          | prospective  | hs-cTnT exhibited a diurnal rhythm, the diurnal hs-cTnT rhythm does not affect the diagnostic accuracy of hs-cTnT for AMI (all AUC >0.93); hs-cTnI exhibited no diurnal rhythm with no differences in AUC among early-morning and evening presenters.                                                                     | 35   |
| Wildi K             | 2018 | hs-cTnI            | prospective  | Diagnostic accuracy for AMI of hs-cTnI assays were high and comparable between patients presenting in the morning versus presenting in the evening                                                                                                                                                                        | 36   |
| Everett BM          | 2015 | hs-cTnI<br>BNP     | prospective  | hsTnI concentrations (M ≥4.6ng/L, F ≥3.9ng/L) and BNP levels (M ≥28.6ng/L, F ≥44.4ng/L) were associated with a first major cardiovascular event; The risk of all-cause mortality was elevated for the highest versus the lowest tertiles of hsTnI and BNP.                                                                | 38   |
| Árnadóttir Á        | 2018 | hs-cTnT/I          | prospective  | The relationship between elevated hs-cTn and mortality was strong for both hs-cTnT and hs-cTnI (HR 6.0 vs. 5.1). The prognostic accuracy for long-term mortality was superior for hs-cTnT than for hs-cTnI (AUC 0.81 vs 0.74, p < 0.001).                                                                                 | 39   |

ACS: acute coronary syndrome; AMI: acute myocardial infarction; AUC: area under the curve; BNP: B-type natriuretic peptide; CVD: cardiovascular death; ESC: European Society of Cardiology; F: female; hs-cTn: high sensitivity troponin; HR: hazard ratios; M: male; MI: myocardial infarction; NPV: negative predictive value

Table S2: Summary of clinical trials for BNP/ NT-proBNP and combined use of cTn and BNP/NT-proBNP.

| First author  | Year | Biomarker (s)                                 | Study design             | Findings                                                                                                                                                                                                                                                                                         | Ref. |
|---------------|------|-----------------------------------------------|--------------------------|--------------------------------------------------------------------------------------------------------------------------------------------------------------------------------------------------------------------------------------------------------------------------------------------------|------|
| Ohkuma T      | 2017 | IL-6<br>hs-CRP<br>hs-cTnT<br>NT-proBNP        | nested case-cohort study | Addition of NT-proBNP to a model including conventional risk factors improved discrimination and classification of the 5-year risk of HF(0.8162 to 0.8800, P <0.001);NT-proBNP alone showed comparable predictive ability compared with conventional risk factors (0.8239 vs. 0.8162, P = 0.74). | 55   |
| Ballo P       | 2016 | NT-proBNP                                     | prospective              | NT-proBNP adds independent and incremental prognostic information to a predictive model (p < 0.0001). This prognostic value is further evident in the elderly and among women.                                                                                                                   | 56   |
| Schellings DA | 2016 | NT-proBNP<br>hs-cTn                           | prospective              | The predictive value of NT-proBNP did not differ significantly compared to the GRACE risk score (AUC: 0.85 vs 0.87, p=0.67);Adjustment of the GRACE risk score by adding NT-proBNP did not improve prognostication                                                                               | 59   |
| Hillis GS     | 2014 | NT-proBNP<br>hs-cTn                           | nested case-cohort study | The addition of NT-proBNP or cTnT improved 5-year risk classification for cardiovascular events ( 39% for NT-proBNP and 46% for hs-cTnT);The combination of NT-proBNP and cTnT provided optimal risk discrimination.                                                                             | 62   |
| Klingenberg R | 2018 | hsTnT<br>NT-proBNP<br>hsCRP<br>PIGF<br>sFlt-1 | prospective              | The prognostic accuracy of the GRACE score was improved when combined with hsTnT, NT-proBNP and hsCRP to yield a 9% increment (C-statistic 0.73->0.82) for the discrimination of short-term risk for all-cause mortality.                                                                        | 63   |
| Puelacher C   | 2018 | NT-proBNP<br>hs-cTn                           | prospective              | The combination of hs-cTnI and BNP with CjB did not provide a significant advantage over the combination of hs-cTnI alone and CjB (AUC 0.74 vs AUC 0.74, p = 0.16). Hs-cTnI showed good prognostic value for AMI (HR 1.6, 95%CI 1.3–1.9), and BNP for death (HR 1.6, 95%CI 1.3–2.1).             | 64   |

AUC: area under the curve; CjB: clinical judgment before exercise stress testing; GRACE: Global Registry of Acute Coronary Events; HF: heart failure; HR: hazard ratios; hs-CRP: high sensitivity C-reactive protein; hs-cTnT: high sensitivity troponin T; IL-6: interleukin-6; NT-proBNP: N-terminal pro-brain natriuretic peptide; PIGF: placental growth factor; sFlt-1: soluble fms-like tyrosine kinase-1

Table S3: Summary of clinical trials for other clinical biomarkers

| First author          | Year | Biomarker (s)             | Study design  | Findings                                                                                                                                                                                                                                                                                                                                                                                                                                                                                                                                                                                                                                            | Ref. |
|-----------------------|------|---------------------------|---------------|-----------------------------------------------------------------------------------------------------------------------------------------------------------------------------------------------------------------------------------------------------------------------------------------------------------------------------------------------------------------------------------------------------------------------------------------------------------------------------------------------------------------------------------------------------------------------------------------------------------------------------------------------------|------|
| Reynoso-Villalpando G | 2017 | CRP<br>IL-6               | unknown       | Serum CRP was increased in ACS patients( $p < 0.0001$ ). STEMI exhibited a higher CRP concentration than NSTEMI and patients with UA (21.81,17.10,and 5.91 mg/L; $p < 0.01$ ). Copeptin level was higher in AMI patients( $p < 0.0001$ ). A troponin I level $< 0.04$ ng/mL in combination with copeptin $< 14$ pmol/L at admission ruled out AMI with an NPV of 97.3 %; Copeptin as strong predictor of intermediate-term mortality (HR 4.28, $p = 0.004$ ).                                                                                                                                                                                       | 65   |
| Afzali D              | 2013 | copeptin<br>Tnl           | prospective   | The combination of copeptin and troponin-T attained a NPV of 86.6% for ACS, of 97.9% for other potentially life-threatening non-ACS diseases and of 85% for all potentially lethal diseases (ACS plus others). Copeptin had better diagnostic performance than Tnl in patients with chest pain within one hour of onset (AMI: $P = 0.022$ , $\leq 1$ hour; STEMI: $P = 0.017$ , $\leq 1$ hour); Tnl and copeptin in combination exhibited better diagnostic performance than CK-MB plus Tnl in AMI and STEMI patients. The accuracy of copeptin in the early diagnosis of AMI is higher than that of CKMB and troponin( $Z = 5.29$ , $P < 0.001$ ). | 67   |
| Folli C               | 2013 | copeptin<br>Tnl           | prospective   | ROC curve analysis of serum Copeptin for discriminating AMI group from UA group showed diagnostic sensitivity and specificity of 100%.                                                                                                                                                                                                                                                                                                                                                                                                                                                                                                              | 69   |
| Jeong JH              | 2020 | CK-MB<br>Tnl<br>copeptin  | prospective   | Copeptin is an independent long-term prognostic marker in HFREF(HR 2.168);The addition of copeptin to the predictive model resulted in a minor (8.21%) improvement, whereas the final, multivariable model showed a significant increase in net reclassification (10.26%, $p = 0.015$ ).                                                                                                                                                                                                                                                                                                                                                            | 71   |
| Abd El Baky Mahmoud M | 2018 | CK-MB<br>cTnl<br>copeptin | unknown       | The ROC of hs-cTnt combined with hscope assay was not better than the ROC for the hs-cTnt by itself ( $P = 0.89$ ). Elevated hs-copep findings did not provide prognostic information that was not already provided by hs-cTnt findings ( $P = 0.56$ ).                                                                                                                                                                                                                                                                                                                                                                                             | 72   |
| Pozsonyi Z            | 2015 | copeptin                  | prospective   |                                                                                                                                                                                                                                                                                                                                                                                                                                                                                                                                                                                                                                                     | 74   |
| Alqu zar A            | 2017 | hs-copep<br>hs-cTnT       | retrospective |                                                                                                                                                                                                                                                                                                                                                                                                                                                                                                                                                                                                                                                     | 75   |

CK-MB: creatine kinase isoenzyme MB; CRP: C-reactive protein; HFREF: heart failure with reduced ejection fraction; HR: hazard ratios; hs-cTnT: high sensitivity troponin T; IL-6: interleukin-6; NPV: negative predictive value; NSTEMI: non-ST-segment elevation myocardial infarction; STEMI: ST-segment elevation myocardial infarction; Tnl: troponin I; ROC: receiver operating characteristic curve; UA: unstable angina

Table S4: Summary of studies for the emerging biomarkers under study

| First author | Year | Biomarker (s)                              | Study design                           | Findings                                                                                                                                                                                                                                                                                                           | Ref. |
|--------------|------|--------------------------------------------|----------------------------------------|--------------------------------------------------------------------------------------------------------------------------------------------------------------------------------------------------------------------------------------------------------------------------------------------------------------------|------|
| Liebetrau C  | 2015 | CRP<br>hs-CRP<br>IL-6<br>Scd40l            | unknown                                | Serum levels of CRP were increased at 24 hours, whereas hs CRP increased as early as 8 hours.IL-6 was increased at 45 minutes, and sCD40l was decreased at 60 minutes.                                                                                                                                             | 76   |
| Kamińska J   | 2018 | IL-6, $\beta$ -TG<br>PLT, MPV<br>LPLT, WBC | unknown                                | WBC, CRP, IL-6, MPV and $\beta$ -TG in ACS patients were higher than those of healthy people.                                                                                                                                                                                                                      | 77   |
| Held C       | 2017 | IL-6<br>hs-CRP                             | prospective                            | L-6 was associated with increased risk of MACE (HR:1.60, P<0.0001); cardiovascular death (HR, 2.15, P<0.0001);MI (HR, 1.53,P<0.05); all-cause mortality (HR, 2.11,P<0.0001); and risk of hospitalization for HF (HR, 2.28,P<0.001).                                                                                | 78   |
| Fanola CL    | 2017 | IL-6                                       | retrospective                          | For every SD increase in IL-6, there was a 10% higher risk of MACE and a 22% higher risk of cardiovascular death or HF. IL-6 (>3.97 pg/mL) had a higher risk of MACE and cardiovascular death or HF.                                                                                                               | 79   |
| Kleveland O  | 2016 | hs CRP<br>hsTnT                            | double-blind, placebo-controlled trial | The median AUC for hs-CRP during hospitalization was 2.1 times higher in the placebo than in the tocilizumab group (4.2 vs. 2.0 mg/L/h, P < 0.001). The median AUC for hsTnT during hospitalization was 1.5 times higher in the placebo group compared with the tocilizumab group (234 vs. 159 ng/L/h, P = 0.007). | 80   |
| Setianto BY  | 2010 | blood count<br>sCD40L                      | unknown                                | Neutrophil count was higher in AMI as compared with UA (P < 0.001), whereas sCD40L did not significantly differ;There is a strong and positive significant correlation between neutrophil count and sCD40L level (r = 0.607, P = 0.002) in UA.                                                                     | 82   |
| Napoleão P   | 2015 | sCD40L<br>eNOS<br>VEGF<br>CD62P            | unknown                                | Time changes of sCD40L over 1 month after MI onset were associated with G894T eNOS polymorphism and with the VEGF concentrations, but not to the platelet CD62P expression.                                                                                                                                        | 83   |
| Tousoulis D  | 2007 | sCD40L<br>IL-6<br>sVCAM-1<br>sICAM-1       | prospective                            | Both CAD and AMI are accompanied by increased levels of sCD40L(P < 0.01).Parallel with an elevation of proinflammatory cytokine IL-6(P < 0.01) and adhesion molecules sVCAM-1 and sICAM-1. (P < 0.05)                                                                                                              | 84   |
| Pusuroglu H  | 2014 | sCD40L                                     | prospective                            | Higher in-hospital and all-cause mortality in patients with sCD40L >0.947 mg/l (7.7 vs. 3.3%, P=0.029; 16.1 vs. 4.8%, P<0.001, respectively).sCD40L value at admission (>0.947 mg/l) is a powerful independent predictor of 1-year all-cause mortality (odds ratio: 3.68;P=0.003).                                 | 85   |
| Kang Q       | 2018 | Gal 3                                      | unknown                                | Gal 3 level of the AMI group was higher than that of the UAP group and SAP group (P<0.05);Gal 3 level of multivessel coronary disease group was higher than that of single vessel group (P<0.05);Galectin-3 was negatively correlated with the LVEF value(r=-0.405, P<0.05).                                       | 86   |
| Bivona G     | 2016 | Gal 3                                      | unknown                                | The concentration of Gal 3 is higher in AMI patients within 1h from admission, and lower at discharge(18 vs 16.8,p = 0.006). Gal 3 levels were correlated to hsTnl and eGFR on admission (r = 0.2; p <0.001 and r = -0.25; p <0.001, respectively).                                                                | 88   |
| French B     | 2016 | Gal 3                                      | prospective                            | Gal 3 levels were associated with risk among participants with preserved LVEF (RR:3.30, P<0.001). Gal 3 can accurately discriminator of risk among participants with preserved LVEF in 5 years(AUC:0.782)                                                                                                          | 89   |
| Zivlas C     | 2017 | CysC<br>Gal 3                              | unknown                                | Plasma CysC was positively correlated with LAVi ( R2 = 0.135, p = 0.019) and log-transformed plasma Gal-3 ( R2 = 0.109, p = 0.042);MRV ( t = 2.236, p = 0.032), CysC ( t = 2.467, p = 0.019) and RVSP ( t = 2.155, p = 0.038) were significant predictors of LAVi.                                                 | 91   |
| Liu K        | 2017 | IL-37                                      | prospective                            | The circulating concentration of IL-37 was higher in the ACS patients than in either of the normal or SAP patients (p<0.05), IL-37 $\geq$ 341.1 pg/ml was independent predictors of in-hospital MACE (p < 0.05).                                                                                                   | 92   |
| Yang T       | 2017 | IL-37                                      | unknown                                | The mortality rate was lower in patients with IL-37 serum<6.4 pg/mL than those with IL-37 serum >6.4 pg/mL at 36-month follow-up (16% vs. 24%, p=0.02, log rank X2=5.39).                                                                                                                                          | 93   |

|                 |      |                                     |               |                                                                                                                                                                                                                                                                                                                                                                                                                                                                                                                                                                         |     |
|-----------------|------|-------------------------------------|---------------|-------------------------------------------------------------------------------------------------------------------------------------------------------------------------------------------------------------------------------------------------------------------------------------------------------------------------------------------------------------------------------------------------------------------------------------------------------------------------------------------------------------------------------------------------------------------------|-----|
| Wallentin L     | 2016 | Lp-PLA2                             | prospective   | Comparing the highest(230 $\mu$ mol/min/L) and lowest(125 $\mu$ mol/min/L) Lp-PLA2 groups, the HR were 1.50 for the primary composite end point (CV death, MI, or stroke). There were no associations between on-treatment Lp-PLA2 activity or changes of Lp-PLA2 activity and outcomes.                                                                                                                                                                                                                                                                                | 94  |
| Kaier TE        | 2017 | cMyC<br>hs-cTnT<br>hs-cTnI<br>cTnI  | prospective   | The discrimination of cMyC for AMI, as quantified by the AUC, was 0.924, compared to the AUCs for hs-cTnT 0.927, hs-cTnI 0.922 ;cMyC was superior to hs-cTnI and standard sensitivity cTnI (P<0.05 for both) and similar to hs-cTnT at predicting death at 3 years.                                                                                                                                                                                                                                                                                                     | 98  |
| Dupuy AM        | 2015 | hs-cTnT<br>h-FABP                   | prospective   | Adding h-FABP to hs-cTnT at 5.8-ng/mL and 14-ng/L thresholds, respectively, increased both sensitivity and NPV for NSTEMI diagnosis, with about 13% and 3% increase,leading to a sensitivity of 97% and an NPV of 99%                                                                                                                                                                                                                                                                                                                                                   | 99  |
| Agnello L       | 2017 | h-FABP<br>hs-Tn                     | prospective   | Among AMI patients, 55% were positive for h-FABP and 34.6% were positive for hs-TnI (p=0.015). h-FABP showed a higher sensitivity(55.5% vs 34%) but lower specificity(89.2% vs 100%) than hs-TnI.                                                                                                                                                                                                                                                                                                                                                                       | 100 |
| Joanna M. Young | 2016 | h-FABP<br>hs-cTnT<br>hs-cTnI        | unknown       | H-FABP<4.3 ng/mL plus hs-cTnI<10.0 ng/L together with a negative ECG maintained >99 % sensitivity for AMI whilst classifying 40.9 % of patients as low-risk. The combination of H-FABP<3.9 ng/mL and hs-cTnT<7.6 ng/L with a negative ECG maintained the same sensitivity whilst classifying 32.1 % of patients as low risk                                                                                                                                                                                                                                             | 102 |
| Vupputuri A     | 2015 | h-FABP<br>CK-MB<br>cTnI             | prospective   | The sensitivity and specificity of h-FABP was 89.7% and 68% for diagnosis of AMI. The sensitivity of h-FABP was superior to initial cTnI and CK-MB, for AMI patients within 6h (100% vs 46.1%, 33% respectively). Serum ESM-1 levels were higher in the AMI group ( P<0.05).                                                                                                                                                                                                                                                                                            | 103 |
| Qiu CR          | 2017 | hsCRP<br>ESM-1                      | unknown       | In patients with AMI, serum ESM-1 levels were not significantly correlated with hsCRP levels. There was no significant correlation between serum ESM-1 level and Gensini score.                                                                                                                                                                                                                                                                                                                                                                                         | 104 |
| Kundi H         | 2017 | hsCRP<br>endocan                    | unknown       | Endocan independently correlated with the presence of STEMI. A cutoff endocan level of 1.7 (ng/mL) predicted the presence of STEMI with a sensitivity of 76.1% and specificity of 73.6%.                                                                                                                                                                                                                                                                                                                                                                                | 106 |
| Qiu C           | 2016 | ESM-1                               | unknown       | Serum ESM-1 level was higher in patients with stress hyperglycemia patients having STEMI (P <0.05). serum ESM-1 levels >1.01 ng/mL (odds ratio 3.01, 95% confidence interval 1.05-8.64, P <0.05) were an independent predictor of MACEs.                                                                                                                                                                                                                                                                                                                                | 107 |
| Wasilewski J    | 2016 | MPV                                 | retrospective | The 12-month all-cause mortality was higher along with an increasing level of MPV (6.7% vs. 5.5% vs. 10.0% vs. 12.8% in each subsequent quartile of MPV; p = 0.0047). The level of MPV was an independent predictor of death or non-fatal MI (adjusted HR 1.16; 95% CI 1.03–1.31; p = 0.017). MPV/P $\geq$ 0.054 was an independent predictor of all-cause mortality (HRs: 1.973, P<0.001), and all-cause mortality/nonfatal myocardial reinfarction (HRs: 1.289, P<0.001);The discriminatory performance of MPV/P ratio was similar to GRACE score but better than MPV | 108 |
| Yu T            | 2017 | MPV/P                               | retrospective | MPV/PC $\geq$ 0.055 was an independent predictor of MACE(HR: 1.121, P < 0.01), all-cause mortality (HR: 1.109,P = 0.020) MPV/PC has good accuracy for predicting MACE (AUC: 0.764) MPV/PC was better than MPV for predicting MACE (MPV/PC ratio versus MPV: z = 2.285, P = 0.022), in patients with STEMI undergoing P-PCI.                                                                                                                                                                                                                                             | 111 |
| Tian C          | 2018 | MPV/PC                              | unknown       | Expressions of pmiR-21 and pmiR-126 were decreased, while pmiR-150 and pmiR-223 were increased in STEMI patients when compared to healthy volunteers (all p<0.01). pmiR-126 exhibited correlation with plasma cardiac troponin I (r = - 0.556, p = 0.011) in STEMI.                                                                                                                                                                                                                                                                                                     | 112 |
| Li S            | 2017 | pmiRNAs<br>sST2<br>GDF-15<br>h-FABP | prospective   | Plasma levels of novel biomarkers were elevated (sST2, GDF-15, h-FABP, suPAR) or inversely downregulated (fetuin A) in patients with AMI compared to a control group with excluded coronary artery disease.(P<0.001,respectively)                                                                                                                                                                                                                                                                                                                                       | 113 |
| Scherthaner C   | 2017 | suPAR                               | retrospective | AUC for predicting MACE occurrence in ACS patients was 0.72 (P = 0.04).                                                                                                                                                                                                                                                                                                                                                                                                                                                                                                 | 115 |
| Jha D           | 2018 | sST2                                | prospective   | The optimal cut-off value for sST2 was 36.5 ng/mL with 87.5% sensitivity and 71.7% specificity.                                                                                                                                                                                                                                                                                                                                                                                                                                                                         | 116 |

|               |      |                           |               |                                                                                                                                                                                                                                                                                                                                                                                                                                                                                                                                                                                                                                                                                          |     |
|---------------|------|---------------------------|---------------|------------------------------------------------------------------------------------------------------------------------------------------------------------------------------------------------------------------------------------------------------------------------------------------------------------------------------------------------------------------------------------------------------------------------------------------------------------------------------------------------------------------------------------------------------------------------------------------------------------------------------------------------------------------------------------------|-----|
| Wang YP       | 2017 | ST2<br>IL-33<br>BNP       | unknown       | Serum levels of ST2, IL-33 and BNP were positively correlated with each other in all AMI patients ( $r = 0.22$ , $r = 0.42$ , $r = 0.23$ , all $p < 0.05$ ); 1-year overall survival rate was higher in AMI patients with low serum levels of ST2 ( $\leq 733.82$ pg/ml), IL-33 ( $\leq 387.75$ pg/ml) and BNP ( $\leq 285.73$ pg/ml) than those with high serum levels of ST2, IL-33 and BNP (all $p < 0.05$ ).                                                                                                                                                                                                                                                                         | 117 |
| Seki K        | 2009 | /                         | Animal model  | IL-33 reduced cardiomyocyte apoptosis, suppressed caspase-3 activity; IL-33 decreased both infarct and fibrosis volumes at 15 days; IL-33 improved ventricular function. IL-33 improved survival after MI in wild-type but not in ST2(-/-) mice.                                                                                                                                                                                                                                                                                                                                                                                                                                         | 119 |
| Chen B        | 2018 | /                         | Animal model  | MI group had higher level of IL-33, sST2, and IL-1 $\beta$ , as well as higher concentrations of markers of fibrosis and inflammation; IL-1 $\beta$ could induce expression of sST2, accelerating the progression of heart failure after acute MI; Eplerenone could improve LV function by reducing expression of IL-1 $\beta$ and sST2. The mRNA levels of IL-33 and sST2 were upregulated in the infarcted myocardium during the first week after AMI. IL-33 levels remained elevated during the first 12 weeks post-AMI, sST2 levels showed a marked drop at 4 weeks. The expression of sST2 positively correlated with cardiac gene expression of inflammatory and fibrosis markers. | 120 |
| Sánchez-Más J | 2014 | /                         | Animal model  | Serum concentrations of IL-33 and sST2 were higher in HF-pEF patients than in patients in non-HF group (median, IL-33: 0.437 $\mu$ g/L vs. 0.127 $\mu$ g/L, $P < 0.01$ ; sST: 0.118 $\mu$ g/L vs. 0.067 $\mu$ g/L, $P < 0.01$ ); The AUC of sST2 for detecting HF-pEF was higher than NT-proBNP in population with high serum IL-33 (AUC: 0.88 vs. 0.83, $P < 0.01$ ).                                                                                                                                                                                                                                                                                                                   | 122 |
| Luo NS        | 2017 | s-ST2<br>IL-33            | unknown       | ST2-R2 score was related to the changes of LVEF and indexed LV sizes; HR for risk of death, using the lower ST2-R2 score strata ( $< 9$ ) as a reference, were 0.49 ( $p < 0.001$ ; score 9-11), 0.27 ( $p < 0.001$ ; score 12-14), and 0.17 ( $p < 0.001$ ; score 15-17) sST2 concentration was higher among patients with adverse events ( $p \leq 0.001$ ).                                                                                                                                                                                                                                                                                                                           | 123 |
| Lupón J       | 2016 | ST2                       | unknown       | Optimal cut-off value to predict cardiac death and re-hospitalization of sST2 is 49ng/ml, with a sensitivity and specificity of 72% and 75%, respectively.                                                                                                                                                                                                                                                                                                                                                                                                                                                                                                                               | 124 |
| Bahuleyan CG  | 2018 | sST2                      | prospective   | BNP had a higher AUC for the diagnosis of HF (0.92) than galectin-3 (0.57) and sST2 (0.63).                                                                                                                                                                                                                                                                                                                                                                                                                                                                                                                                                                                              | 126 |
| Mueller T     | 2016 | BNP<br>galectin-3<br>sST2 | prospective   | The AUC of BNP for the prediction of one-year all-cause mortality in HF patients (0.72) was not different from the AUCs of galectin-3 (0.70) and sST2 (0.75).                                                                                                                                                                                                                                                                                                                                                                                                                                                                                                                            | 127 |
| Tang WH       | 2016 | sST2<br>NT-proBNP         | prospective   | Higher sST2 levels were associated with increased death risk at 180 days (baseline HR: 2.21; follow-up HR: 2.64; both $p < 0.001$ ); Prognostic value of baseline sST2 diminished after adjusting for clinical covariates and aminoterminal pro-BNP ST2 is independently associated with cardiovascular mortality (hazard ratio: 1.27, $p = 0.014$ ).                                                                                                                                                                                                                                                                                                                                    | 129 |
| Bayes-Genis A | 2014 | ST2<br>Gal-3              | unknown       | Incorporation of ST2 into a full-adjusted model for all-cause mortality improved discrimination (C-statistic: 0.77, $p = 0.004$ ) and calibration, and reclassified significantly better                                                                                                                                                                                                                                                                                                                                                                                                                                                                                                 | 130 |
| Tang L        | 2016 | Cys-C                     | prospective   | The incidence of CHF in patients with Cys-C $\geq 1.36$ mg/L was higher than Cys-C $< 1.36$ mg/L (18.5 vs. 5.6 %, $p = 0.022$ ). Cys-C levels at admission were a independent predictor of angiographic no-reflow and the development of CHF at 6-month follow-up.                                                                                                                                                                                                                                                                                                                                                                                                                       | 131 |
| Correa S      | 2018 | Cys-C                     | prospective   | Increasing concentration of Cys-C was associated with a 28% higher hazard of cardiovascular death or heart failure hospitalization (HR:1.28, $P < 0.001$ ).                                                                                                                                                                                                                                                                                                                                                                                                                                                                                                                              | 132 |
| Shen G        | 2018 | Cys-C                     | retrospective | Cys-C was associated with a higher hazard of CVD, myocardial infarction, or stroke (HR 1.15, $P < 0.01$ ). As cystatin C levels from low to high ( $< 0.84$ , $0.84-1.03$ and $\geq 1.04$ mg/L), all-cause mortalities were increased 0.9%, 3.7% and 9.5% ( $P < 0.001$ ), as well as the composite endpoints, 11.1%, 21.7% and 40.7%, respectively ( $P < 0.001$ ).                                                                                                                                                                                                                                                                                                                     | 133 |
| Akgul O       | 2013 | Cys-C                     | prospective   | Higher in-hospital and 1-month cardiovascular mortality rates were observed in the Cys-C $> 1.12$ mg/L group (9.4% vs. 1.6%, $P < 0.001$ and 14.5% vs. 2.2%, $P < 0.001$ , respectively). Admission Cys-C $> 1.12$ mg/L was a independent predictor of one-month cardiovascular mortality (odds ratio, 5.3; $P = 0.02$ ).                                                                                                                                                                                                                                                                                                                                                                | 134 |

|                |      |                                   |                              |                                                                                                                                                                                                                                                                                                                                                    |     |
|----------------|------|-----------------------------------|------------------------------|----------------------------------------------------------------------------------------------------------------------------------------------------------------------------------------------------------------------------------------------------------------------------------------------------------------------------------------------------|-----|
| Devaux Y       | 2012 | miRNA-208b<br>miRNA-499           | unknown                      | miRNA-208b and miR-499 were increased in MI patients (>10(5)-fold, P < 0.001);In patients who presented <3 h after onset of pain, miR-499 was positive in 93% of patients and hs-cTnT in 88% of patients (P= 0.78);miR-499 and hs-cTnT provided comparable diagnostic value with areas under the ROC curves of 0.97.                               | 136 |
| D'Alessandra Y | 2010 | miRNAs                            | unknown                      | Acute MI up-regulated miRNA-1, -133a, -133b, and -499-5p plasma levels, both in humans and mice, whereas miR-122 and miRNA-375 were lower than control only in STEMI patients.                                                                                                                                                                     | 137 |
| Adachi T       | 2010 | miRNA-499                         | unknown                      | miR-499 was produced almost exclusively in the heart. Plasma miR-499 concentrations were measurably increased in all individuals with AMI                                                                                                                                                                                                          | 138 |
| Kuwabara Y     | 2011 | miRNAs                            | unknown                      | Mouse model of MI indicated that the levels of miR-1, miR-133a, miR-208a, and miR-499 were significantly reduced in the infarcted myocardium.                                                                                                                                                                                                      | 141 |
| Li M           | 2018 | lncRNAs                           | unknown                      | Circulating miR-133a in patients with cardiovascular diseases originate mainly from the injured myocardium. The ROC curve showed that LIPCAR (AUC=0.782) had better diagnostic accuracy. higher levels of LIPCAR were independent predictors of major adverse cardiovascular events in patients with STEMI (HR=5.93, P=0.001).                     | 142 |
| Gao L          | 2017 | lncRNAs                           | cohort study<br>animal model | HOTAIR expression was decreased in the serum of AMI patients and in mice subjected to coronary artery ligation. The adenovirus vector-driven overexpression of HOTAIR limited hypoxia-induced myocyte apoptosis.                                                                                                                                   | 143 |
| Kumarswamy R   | 2014 | LIPCAR                            | prospective                  | LIPCAR was downregulated early after MI but upregulated during later stages. LIPCAR levels identified patients developing cardiac remodeling and were independently to other risk markers associated with future cardiovascular deaths.                                                                                                            | 145 |
| Zhao P         | 2018 | lncRNAs                           | prospective                  | Compared to the lncRNA expression profiles of noncoronary artery controls, a total of 106 differentially expressed lncRNAs were discriminated in AMI patients, including 40 upregulated lncRNAs and 66 downregulated lncRNAs (P < 0.05).                                                                                                           | 146 |
| Hu Y           | 2015 | SIRT1                             | unknown                      | The mRNA expression levels of the SIRT1 gene in the microarray study were significantly lower in the AMI,UA and overall ACS patients(all p<0.01);There is a significant differences in the SIRT1 mRNA expression among the allelic genes of rs3758391 (p < 0.01) in the healthy participants.                                                      | 148 |
| Akkafa F       | 2015 | SIRT1                             | unknown                      | SIRT1 expression were reduced in both HF subtypes, particularly in dHF. (p=0.002, control vs cHF; p<0.001, control vs dHF). SIRT1 expression was correlated with the oxidant levels and antioxidant capacity.                                                                                                                                      | 149 |
| Duarte VHR     | 2019 | TREM4                             | unknown                      | TREM4 is upregulated in the early phase of ACS. Increased TREM4 mRNA expression in blood leukocytes is influenced by gene polymorphisms. TREM4 polymorphisms were not associated with coronary lesion extent.                                                                                                                                      | 150 |
| Silbiger VN    | 2013 | whole genomic expression analysis | unknown                      | A total of 549 genes were found to be differentially expressed in the first 48 h after the ACS-Ph1.                                                                                                                                                                                                                                                | 151 |
| Boufenzler A   | 2015 | TREM-1                            | prospective                  | TREM-1 expression is upregulated in ischemic myocardium in mice and humans. TREM-1 blockade ameliorates cardiac function and limits ventricular remodeling                                                                                                                                                                                         | 152 |
| Schopfer DW    | 2014 | GDF-15                            | prospective                  | Each doubling in GDF-15 was associated with a 2.5-fold increased rate of CV events (HR:2.53, P <0.001). Participants GDF-15>2660 ng/L had higher mortality compared with those GDF-15<1770 ng/L (HR 2.73, P ≤0.001). Addition of GDF-15 to existing risk factors resulted in a 50% change in net reclassification of patients' risk for mortality. | 154 |
| Wang X         | 2016 | GDF-15                            | unknown                      | Serum GDF-15 levels were increased in CAD grou(p< 0.001). A positive correlation was observed between GDF-15 and the Gensini score (r = 0.85, P < 0.001). Serum GDF-15 level had a 80.0% sensitivity and 91.7% specificity for predicting CAD.                                                                                                     | 155 |

|                  |      |                                 |               |                                                                                                                                                                                                                                                                                                                |     |
|------------------|------|---------------------------------|---------------|----------------------------------------------------------------------------------------------------------------------------------------------------------------------------------------------------------------------------------------------------------------------------------------------------------------|-----|
| Gutiérrez-Leonar | 2017 | PAPP-A<br>CAT<br>SOD-1<br>SOD-2 | unknown       | Coronary PAPP-A levels were elevated among patients at risk for cardiovascular disease ( $p < 0.05$ ); Antioxidant enzyme activities were higher in coronary samples than in peripheral samples from subjects with ischemic cardiopathy secondary to atherosclerosis ( $P < 0.001$ ).                          | 160 |
| Iversen KK       | 2008 | PAPP-A<br>CKMB<br>troponin T    | unknown       | Mean PAPP-A values at admission were higher in patients with STEMI ( $p < 0.01$ ); In samples drawn $< 2$ hours after admission, the sensitivity of PAPP-A was superior (93%) to that of CKMB (60%) and troponin T (61%).                                                                                      | 161 |
| Lund J           | 2003 | cTn<br>PAPP-A<br>CRP            | retrospective | At a cutoff level of 2.9 mIU/L, elevated PAPP-A was an independent predictor of adverse outcome (RR:4.6, $P=0.002$ ). Another independent predictor was admission CRP $> 2.0$ mg/L (RR, 2.6; $P=0.03$ ).                                                                                                       | 162 |
| Tan B            | 2019 | PRMT5                           | unknown       | Expression levels of the PRMT5 gene in peripheral blood from patients with AMI are lower than in patients with stable cardiovascular disease ( $Z = -4.813, p = 0.000$ ). Patients who have a low PRMT5 expression in the peripheral blood are 5.472 times more likely to suffer from AMI than other patients. | 164 |
| Tan B            | 2019 | PIK3C2A                         | retrospective | PIK3C2A gene expression in peripheral blood of AMI patients was lower than one in the non-coronary heart disease subjects. Low expression of PIK3C2A gene was an independent risk factor of AMI and increased the risk of AMI by 2.231 folds.                                                                  | 165 |

BNP: B-type natriuretic peptide; CAD: coronary artery disease; CAT: catalase; CD62P: platelet expression of P-selectin; CHF: compensated heart failure; CysC: cystatin C; ECG: electrocardiogram; eGFR: estimated glomerular filtration rate; ESM-1: endothelial cell-specific molecule 1; eNOS: endothelial nitric oxide synthase; Gal-3: galectin-3 GDF-15: growth-differentiation factor-15; h-FABP: heart-type fatty acid binding protein; HFpEF: preserved left ventricular ejection fraction; HOTAIR: HOX antisense intergenic RNA; IL-33: interleukin-33; IL-37: interleukin-37; LAVi: LA volume index; LIPCAR: mitochondrial long noncoding RNA uc022bqs.1; lncRNA: long noncoding RNA; LPLT: large platelet; Lp-PLA2: lipoprotein-associated phospholipase A2; LVEF: left ventricular ejection fraction; MACE: major adverse cardiovascular events; mi-RNA: microRNA; MPV: mean platelet volume; MPV/P: mean platelet volume to platelet count ratio; MPV/PC: mean platelet volume/platelet count; MRV: mitral regurgitant volume; PAPP-A: Pregnancy-Associated Plasma Protein-A; PIK3C2A: class II phosphatidylinositol 3-phosphate kinase; PLT: platelet; pmiRNAs: platelet microRNAs; PPMT5: protein arginine methyltransferase 5; PRMT5: the protein arginine methyltransferase 5; RVSP: right ventricular systolic pressure; SAP: stable angina pectoris; sCD40L: soluble CD40 ligand; SIRT-1: sirtuin 1; sICAM-1: soluble intercellular adhesion molecule-1; SOD-1: superoxide dismutase-1; SOD-2: superoxide dismutase-2; sST2: soluble suppression of tumorigenicity 2; ST2: suppression of tumorigenicity 2; suPAR: soluble urokinase plasminogen activator receptor; SVCAM-1: soluble vascular cell adhesion molecule-a; TREM-1: triggering receptor expressed on myeloid cells 1; TREM-4: triggering receptor expressed on myeloid cells 4; UAP: unstable angina pectoris; VEGF: vascular endothelial growth factor;  $\beta$ -TG: beta-thromboglobulin
